# Supplementary material for: Preparation of Fe–N–C catalysts with FeNx (x = 1, 3, 4) active sites and comparison of their activities for the oxygen reduction reaction and performances in proton exchange membrane fuel cells
Source: Royal Society of Chemistry journal article supplement (doi:10.1039/c9ta08532g), 2019-01-01
Supplement: c9ta08532g1.pdf [file c9ta08532g1.pdf]

## Supporting information:

### **Preparation of Fe-N-C Catalysts with FeN<sub>x</sub> (x=1, 3, 4) Active Sites and Comparison of Their Activities for Oxygen Reduction Reaction and Performances in Proton Exchange Membrane Fuel Cell**

*Yongcheng Li,<sup>1</sup> Xiaofang Liu,<sup>1</sup> Lirong Zheng,<sup>2</sup> Jiaxiang Shang,<sup>\*1</sup> Xin Wan,<sup>1</sup> Riming Hu,<sup>1</sup> Xu Guo,<sup>1</sup> Song Hong<sup>c</sup>  
and Jianglan Shui<sup>\*1</sup>*

<sup>1</sup>School of Materials Science and Engineering, Beihang University, No. 37 Xueyuan Road, Beijing 100083, China

<sup>2</sup>Beijing Synchrotron Radiation Facility, Institute of High Energy Physics, Chinese Academy of Sciences, No. 19 Yuquan Road, Beijing 100049, China

<sup>3</sup>State Key Laboratory of Chemical Resources Engineering Beijing Key Laboratory of Electrochemical Process and Technology for Materials, Beijing 10029, China

E-mail: shangjx@buaa.edu.cn; shuijianglan@buaa.edu.cn

## Experimental Section

### 1. Materials

#### Chemicals

Zinc nitrate hexahydrate ( $\text{Zn}(\text{NO}_3)_2 \cdot 6\text{H}_2\text{O}$ , 99%), zinc oxide (ZnO) and 2-Methylimidazole (2MIm) were purchased from Sinopharm Chemical Reagent. Pt/C(20 wt%) catalyst was purchased from BASF. Ferric chloride ( $\text{FeCl}_3 \cdot 6\text{H}_2\text{O}$ , 99%) was purchased from Xilong Scientific Co., Ltd. Carbon black (BP) were purchased from Aladdin Industrial Corporation. All reagents are of analytical grade and used as received without further purification.

#### Preparation of ZIF-8 by liquid-phase synthesis method

ZIF-8 NPs with a size around 100 nm were prepared following a reported liquid-phase synthesis method with a little modification.<sup>1</sup>  $\text{Zn}(\text{NO}_3)_2 \cdot 6\text{H}_2\text{O}$  (2.94 g) was dissolved in 100 mL methanol. 2MIm (3.24 g) was dissolved in another 100 mL methanol. Then, the 2MIm solution was poured into the  $\text{Zn}(\text{NO}_3)_2 \cdot 6\text{H}_2\text{O}$  solution. The mixture was stirred for 2.5 hours at room temperature (20 °C). The obtained precipitate was collected by centrifugation, washed three times with methanol, and finally dried in vacuum at 60 °C overnight.

#### Preparation of ZIF-8 by solid-phase synthesis method

2MIm (1.707 g) and ZnO (0.638 g) were uniformly mixed and sealed in an autoclave in Ar atmosphere. The mixture was heat treated at 220 °C for 18 hours in the autoclave. The obtained white crystals were ball-milled for 8 h with 6 mm stainless steel balls at 300 rpm under Ar protection.

#### Preparation of FeNC-300/500/1000 catalysts

ZIF-8 powder was placed in a ceramic boat and heated in a tube furnace at 1000 °C for 1 hour under flowing Ar gas. The obtained products were intermediate nitrogen doped carbon (denoted as N/C\*). 80 mg N/C\* was added into a three-neck flask (50 mL) containing DI water (80 mL) to form a homogeneous suspension by ultrasonication.  $\text{FeCl}_3 \cdot 6\text{H}_2\text{O}$  (22.84 mg) was dissolved in DI water (4.56 mL) and dropwise added into the N/C\* suspension. After stirring for 60 min at room temperature, the suspension was heated at 70 °C for 8.5 h. The  $\text{Fe}^{3+}$  anchored N/C (Fe@N/C\*) NPs, was thoroughly washed and collected by centrifugation, and then dried in a vacuum oven at 60

°C for 5 hours. The catalysts FeNC-300, FeNC-500 and FeNC-1000 were obtained by heating Fe@N/C\* at 300, 500 and 1000 °C under Ar atmosphere for 2 h, respectively.

**Note:** For accurate parallel comparison, the reference catalyst, i.e. nitrogen doped carbon (denoted as N/C), was also washed with DI water, dried and heat treated at 1000 °C for 2 h.

### **Preparation of catalysts Fe-C-300/500/1000**

80 mg carbon black was added into a three-neck flask (50 mL) containing DI water (80 mL) to form a homogeneous suspension by ultrasonication. FeCl<sub>3</sub>·6H<sub>2</sub>O (22.84 mg) was dissolved in DI water (4.56 mL) and dropwise added into the carbon black suspension. After stirring for 60 min at room temperature, the suspension was heated at 70 °C for 8.5 h. The Fe<sup>3+</sup> anchored C (Fe@C), was thoroughly washed and collected by centrifugation, and then dried in a vacuum oven at 60 °C for 5 hours. The catalysts Fe-C-300, Fe-C-500 and Fe-C-1000 were obtained by heating Fe@C at 300, 500 and 1000 °C under Ar atmosphere for 2 h, respectively.

### **Preparation of catalysts NC-300/500/1000**

80 mg N/C\* was added into a three-neck flask (50 mL) containing DI water (80 mL) to form a homogeneous suspension by ultrasonication. After stirring for 60 min at room temperature, the suspension was heated at 70 °C for 8.5 h, and was thoroughly washed and collected by centrifugation, and then dried in a vacuum oven at 60 °C for 5 h. The catalysts NC-300, NC-500 and NC-1000 were obtained by heating N/C\* at 300, 500 and 1000 °C under Ar atmosphere for 2 h, respectively.

## **2. Electrochemical measurements**

### **Half-cell tests**

The oxygen reduction reaction (ORR) activities of the catalysts were measured by a rotating ring-disk electrode (RRDE, Pine Research Instrumentation, USA) technique with a three-electrode system in 0.5 M H<sub>2</sub>SO<sub>4</sub> or 0.1 M KOH water solution at a rotating speed of 1600 rpm. Poisoning test was conducted by adding KSCN water solution (0.375 M, 2 mL) into O<sub>2</sub>-saturated H<sub>2</sub>SO<sub>4</sub> (0.5 M, 150 mL) during Chronoamperometric experiment at 0.50 V vs RHE. The reference electrode was a saturated calomel electrode (SCE) and the counter electrode was a carbon rod. All potentials measured in this work were converted to the reversible hydrogen electrode (RHE) scale.

The non-Pt catalyst ink was prepared by mixing 5 mg catalyst in a mixture of 10  $\mu\text{L}$  Nafion alcohol solution (5 wt.%, Aldrich), 215  $\mu\text{L}$  deionized water and 275  $\mu\text{L}$  isopropanol, and then sonicating for 20 min to form a homogeneous catalyst ink. The catalyst ink was loaded on a glass carbon electrode with a loading of 0.4  $\text{mg cm}^{-1}$ . The concentration of Pt/C(20%) ink was 0.5  $\text{mg mL}^{-1}$ , and the Pt loading was 20  $\mu\text{g cm}^{-2}$  on the glass carbon electrode.

The capacitive background of catalyst was obtained in Ar-purged electrolyte at a scan rate of 10  $\text{mV s}^{-1}$ . Before each electrochemical measurement, the electrolyte solution was purged with  $\text{O}_2$  for 30 min to achieve a  $\text{O}_2$ -saturated solution. 20 cycles of cyclic voltammetry were firstly applied on the electrode to make a stable polarization curves, then linear sweep voltammetry (LSV) was recorded. The oxygen reduction currents were obtained by subtracting the capacitive background measured in the Ar-saturated electrolyte. The ring potential was set at 1.25 V vs. RHE to oxidate  $\text{H}_2\text{O}_2$ . The stability tests were performed in  $\text{O}_2$ -saturated 0.5 M  $\text{H}_2\text{SO}_4$  at 0.5 V vs. RHE.

The peroxide yield was calculated from the ring current ( $I_r$ ) and the disk current ( $I_d$ ) using the equation:

$$\text{H}_2\text{O}_2(\%) = 200 \times \frac{I_r}{I_r + 0.37I_d} \quad (\text{S1})$$

The electron transfer number in acid was computed by the equation:

$$n = \frac{4I_d}{I_r + \frac{I_d}{0.37}} \quad (\text{S2})$$

The collection efficiency of the Pt ring was 37%.

### Proton exchange membrane fuel cell tests

The catalyst and Nafion solution (dry weight ratio of 1:1) were mixed in isopropanol/water (volume ratio of 1:1). The ink was sonicated and stirred to form a homogeneous catalyst ink. Afterwards, the ink was brushed onto a piece of 5  $\text{cm}^2$  carbon paper and dried in a vacuum oven at 80  $^\circ\text{C}$  for 2 h. The cathode catalyst loading was 1 to 4  $\text{mg cm}^{-2}$  for non-Pt catalysts and 0.35  $\text{mg cm}^{-2}$  for Pt/C(20 wt%). The anode was the same Pt/C(20 wt%) electrode. Then the as-prepared anode and cathode were sandwiched in a piece of Nafion 211 membrane (DuPont<sup>®</sup>), which was hot-pressed at 130  $^\circ\text{C}$  for 2 min under a pressure of 300 pounds  $\text{cm}^{-2}$  to obtain a membrane electrode assembly (MEA). The MEA performance was assessed in a fuel cell fixture controlled by a fuel cell test station (850e,

Scribner Associates Inc.). The fuel cell operation condition is: 80 °C, 100% humidified H<sub>2</sub> and O<sub>2</sub> with flow rates of 200 and 240 mL min<sup>-1</sup>, respectively. The gauge pressures of H<sub>2</sub> and O<sub>2</sub> were 22 psig.

### 3. Characterization

The morphologies of the materials were characterized by scanning electron microscopy (SEM, JSM-7500F, JEOL) and scanning transmission electron microscopy (STEM, JEM-2100F, JEOL) equipped with an energy-dispersive X-ray spectroscope (EDS, X-Max-65T, Oxford) for collecting the elemental mapping of the catalysts. The images of single iron atoms were obtained by a high-angle annular dark-field scanning transmission electron microscopy (HAADF-STEM, FEI Titan Cubed Themis G2 300) operated at 200 kV. The crystal structure of the samples was characterized by X-ray diffractometer with Cu K $\alpha$  irradiation (Rigaku D/max 2500). X-ray photoelectron spectroscopy (XPS) measurements were performed on ESCALAB 250Xi using Al K $\alpha$  irradiation. Nitrogen adsorption–desorption isotherms were collected by the SSA-7000 system (bjbuilder Instruments) at 77.3 K. Inductively coupled plasma optical emission spectroscopy (ICP-OES) was conducted on the Optima-7000DV. The specific surface area was obtained using the Brunauer–Emmett–Teller (BET) method. X-ray absorption spectroscopy (XAS) was performed at room temperature on the 1W1B beamline at BSRF (Beijing Synchrotron Radiation Facility). The catalyst sample was prepared by pressing a disk (diameter 6 mm) with ~30 mg catalyst and paraffin binder. The reference sample of iron phthalocyanine was prepared by mixing with BN powder at a weight ratio of 1:6. Transmissive-mode Fe K-edge XAFS data were collected for all samples over a range of 6974–8110 eV, where a 100% Ar filled Lytle ion-chamber detector with Mn X-ray filters and soller slits were used. The monochromator energy was calibrated using a Fe foil. The XAFS data were analyzed using IFEFFIT<sup>2</sup>. Least-squares curve parameter fitting was performed to obtain the quantitative structural parameters around iron atoms, using the ARTEMIS module of IFEFFIT software packages. The XAFS raw data were background subtracted, normalized and Fourier transformed by standard procedures within the ATHENA program. The FeN<sub>x</sub> (x=1, 3, 4) moiety models were built based on pyridinic N-based structures, which are widely used in many studies of M-N-C catalysts as shown in Figure S14.<sup>3-5</sup> To avoid artificial biases, all models were optimized by density functional theory (DFT) calculation. Thermogravimetric analysis (Netzsch STA449F3, Germany) were performed in air atmosphere at the temperature range of 20–850 °C with a heating rate of 10 °C min<sup>-1</sup>.

### 4. DFT calculations

The computations were performed using the Vienna ab initio simulation package (VASP)<sup>6,7</sup> in the framework of density functional theory (DFT). The projector augmented wave (PAW)<sup>8</sup> pseudopotential was adopted and the GGA exchange-correlation function was described by Perdew Burke Ernzerhof (PBE).<sup>9</sup> The cutoff energy of the plane-waves was set to 500 eV. The Brillouin zone was sampled with a Monkhorst-Pack 3×3×1 *k*-point grid. The force convergence criterion for atomic relaxation was 0.01 eV Å<sup>-1</sup>.

The formation energy ( $E_f$ ) was calculated as:

$$E_f = E_{total} - \sum_x n_x \mu_x \quad (S3)$$

where  $E_{total}$  is the total energy of the Fe and N embedded systems,  $n_x$  is the number of C, N and Fe atom.  $\mu_x$  refer to the chemical potential of a single atom derived from graphene, N<sub>2</sub> molecule and a single Fe atom in vacuum, respectively.

The adsorption energies of oxygen-containing intermediates on FeN<sub>x</sub> (x=1~5) were calculated as follows:<sup>10</sup>

$$\Delta E_{O^*} = E_{O^*} - E_* - [E_{H_2O} - E_{H_2}] \quad (S4)$$

$$\Delta E_{OH^*} = E_{OH^*} - E_* - [E_{H_2O} - 1/2 E_{H_2}] \quad (S5)$$

$$\Delta E_{OOH^*} = E_{OOH^*} - E_* - [2E_{H_2O} - 3/2 E_{H_2}] \quad (S6)$$

where  $E_*$ ,  $E_{O^*}$ ,  $E_{OH^*}$ , and  $E_{OOH^*}$  stand for the total energies of catalyst substrate without and with the adsorption of O, OH and OOH, respectively.  $E_{H_2O}$  and  $E_{H_2}$  are the total energies of H<sub>2</sub>O and H<sub>2</sub> molecules in gas phases, respectively. According to the formula, a more negative value of  $E_{ads}$  indicates a higher thermodynamic stability of the composite system. The adsorption free energies can be obtained by including the zero point energy (ZPE) energies and entropy (S) corrections in equation:

$$\Delta G = \Delta E_{ads} + \Delta ZPE - T\Delta S \quad (S7)$$

The  $\Delta ZPE$  and  $\Delta S$  could be obtained from the calculation of vibrational frequencies for the adsorbed species. The entropies and vibrational frequencies of the species in gas phase were taken from NIST database.

As for oxygen reduction reaction (ORR) in acid electrolyte, the overall reaction scheme of the ORR can be written as:

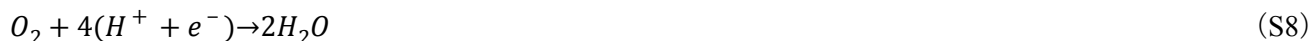

The ORR can be carried out by following four basic steps (S1-S4), which are commonly used to study the electrocatalysis of the ORR on various materials:

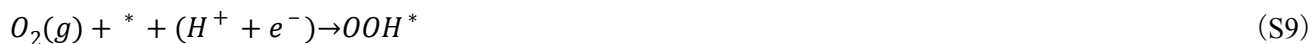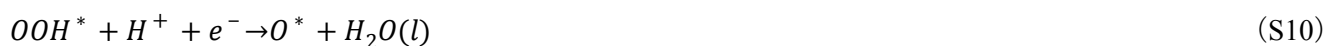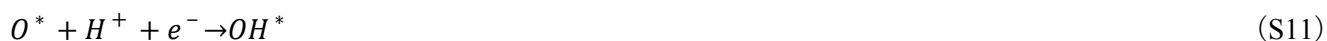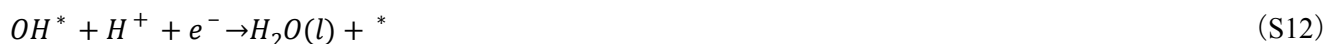

where \* stands for an active site on the base site, (l) and (g) refer to liquid and gas phases, respectively. O\*, OH\*, and OOH\* are adsorbed intermediates.

The calculation of ORR free energy diagrams was performed according to the method proposed by Nørskov et al.<sup>11</sup> The free energy was calculated by the equation:

$$\Delta G = \Delta E + \Delta ZPE - T\Delta S \quad (S13)$$

where  $\Delta E$  is the reaction energy change obtained from DFT calculations,  $T$  is the temperature (298.15K). The free energy of  $(H^+ + e^-)$  under standard conditions at pH=0 and  $U = 0$  is taken to be 1/2 of  $H_2$ . The free energy of  $O_2$  was obtained from the free energy change of the reaction  $O_2 + 2H_2 = 2H_2O$  for which a free energy change is 4.92 eV at the temperature of 298.15 K and the pressure of 0.035 bar.<sup>12, 13</sup>

$ZPE$  and  $TS$  of gas molecules and the ORR intermediates were listed in Supplementary Table S10. The ORR overpotentials ( $\eta$ ) can be computed by the equations as follows:

$$\eta = \max(\Delta G1, \Delta G2, \Delta G3, \Delta G4)/e + 1.23V \quad (S14)$$

## 5. Supplemental Figures and Tables

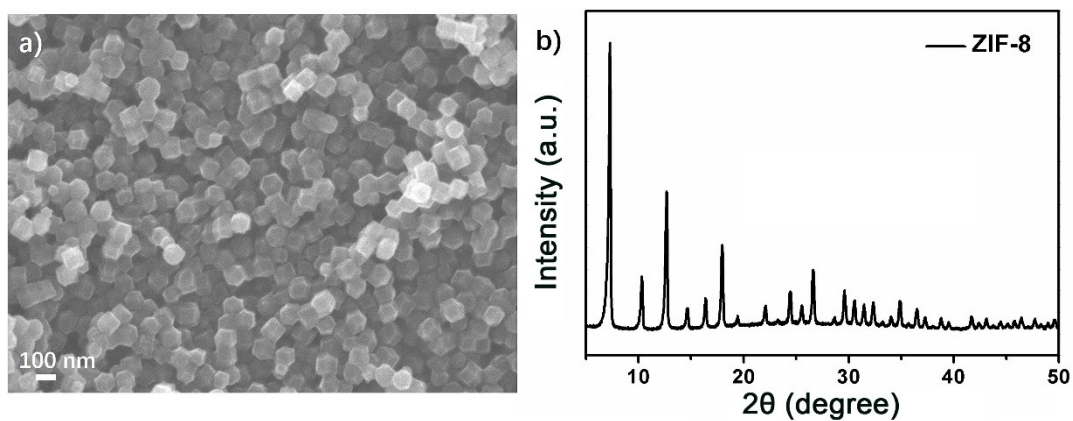

**Figure S1.** a) SEM image and b) XRD pattern of ZIF-8 NPs synthesized through a liquid-phase approach.

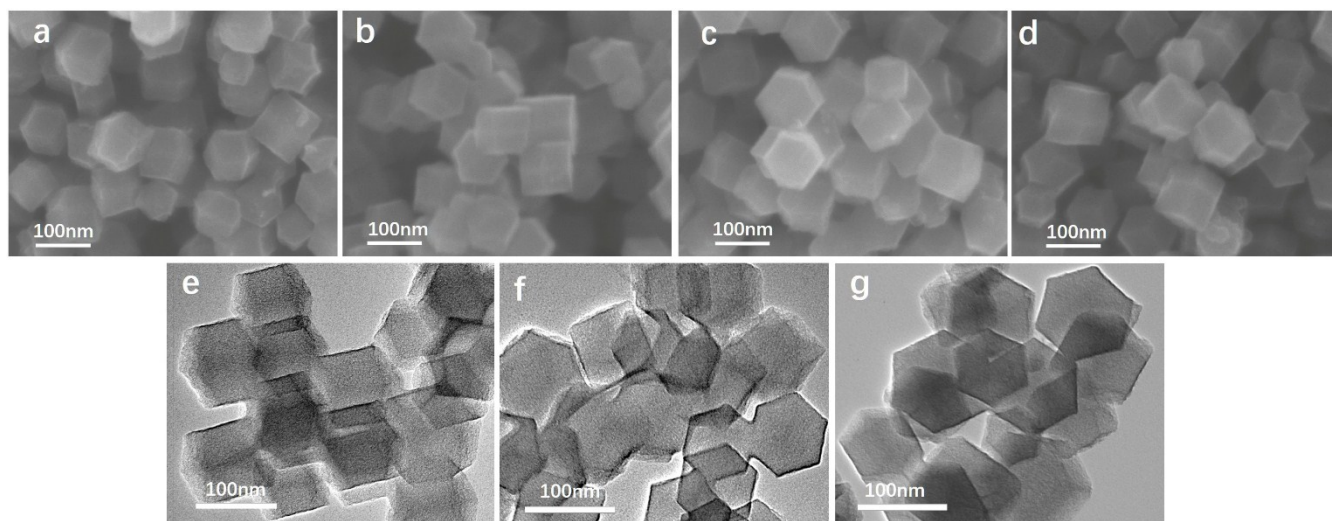

**Figure S2.** SEM images of a) N/C, b) FeNC-300, c) FeNC-500, d) FeNC-1000 and TEM image of e) FeNC-300, f) FeNC-500, g) FeNC-1000.



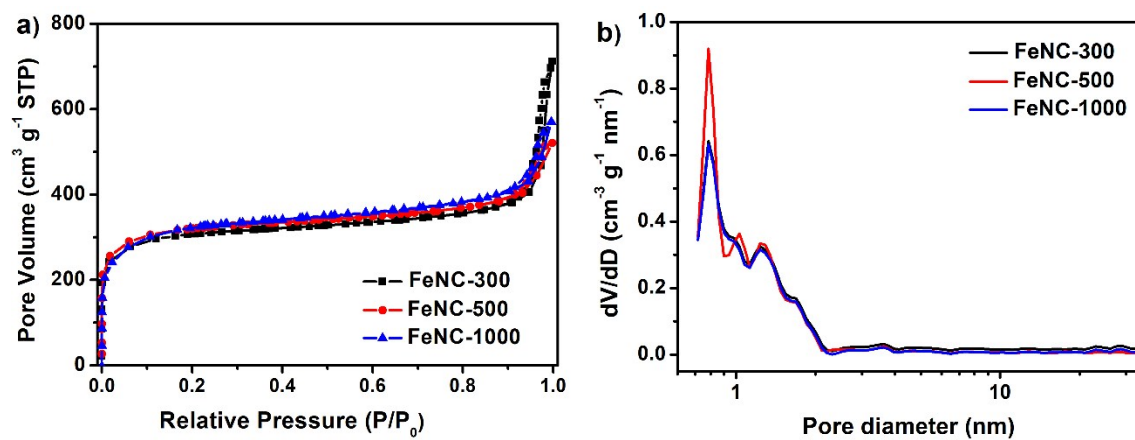

**Figure S3.** a) N<sub>2</sub> adsorption and desorption isotherms and b) pore size distribution of FeNC-300/500/1000.

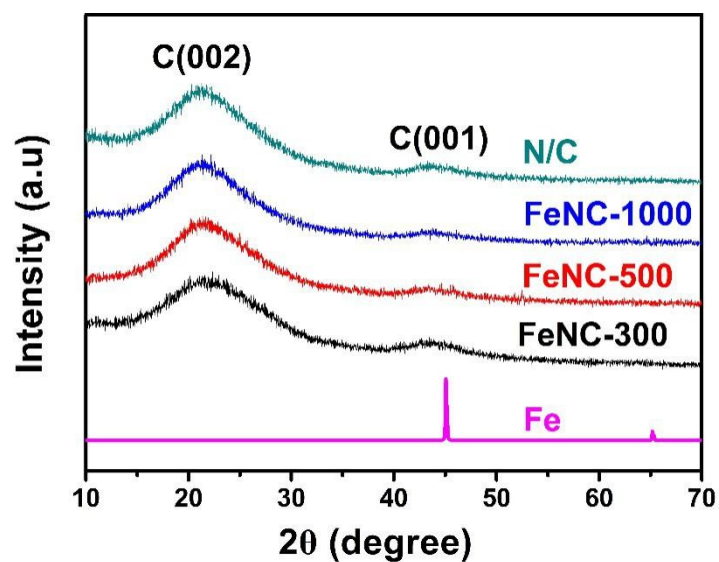

**Figure S4.** XRD patterns of N/C, FeNC-300, FeNC-500 and FeNC-1000.

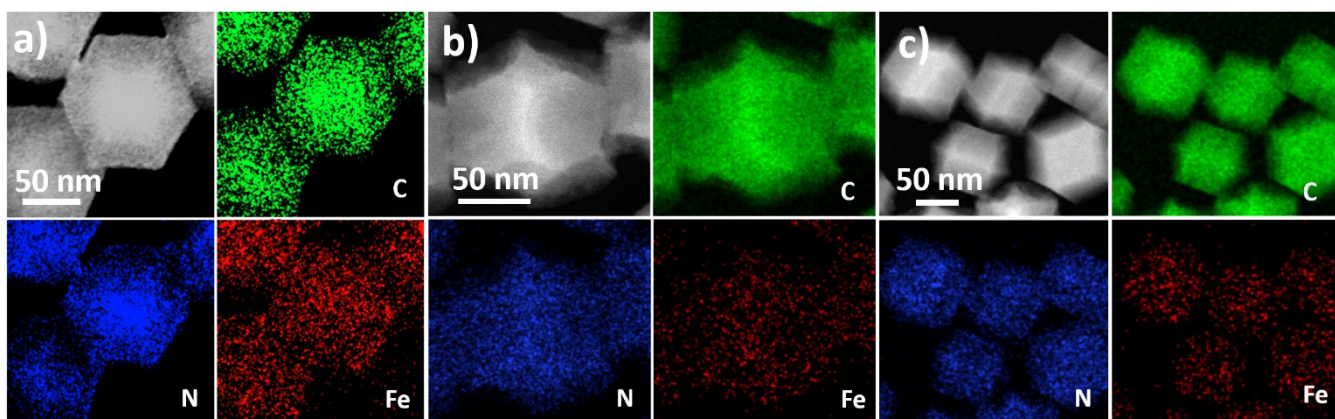

**Figure S5.** STEM image and corresponding elemental mappings of a) FeNC-300, b) FeNC-500 and c) FeNC-1000 nanoparticles.

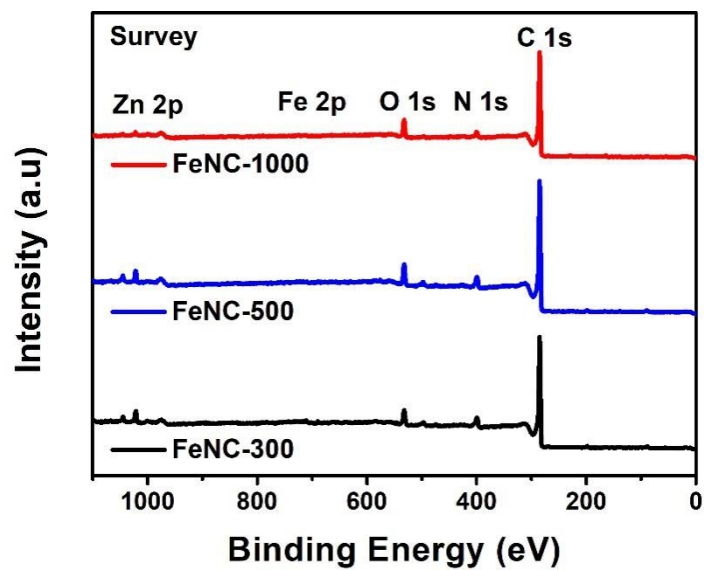

**Figure S6.** XPS survey of FeNC-300/500/1000.

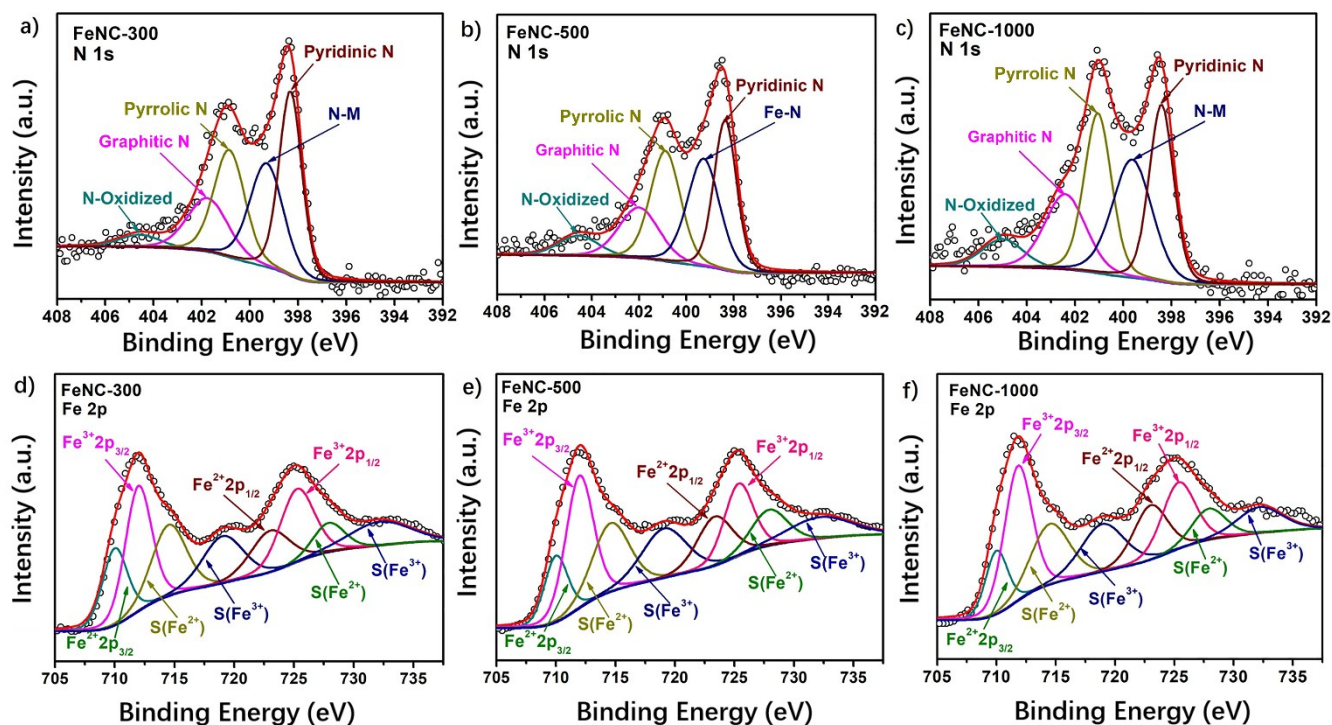

**Figure S7.** XPS spectra of N 1s for a) FeNC-300, b) FeNC-500 and c) FeNC-1000 catalysts, and Fe 2p for c) FeNC-300, d) FeNC-500 and e) FeNC-1000 catalysts

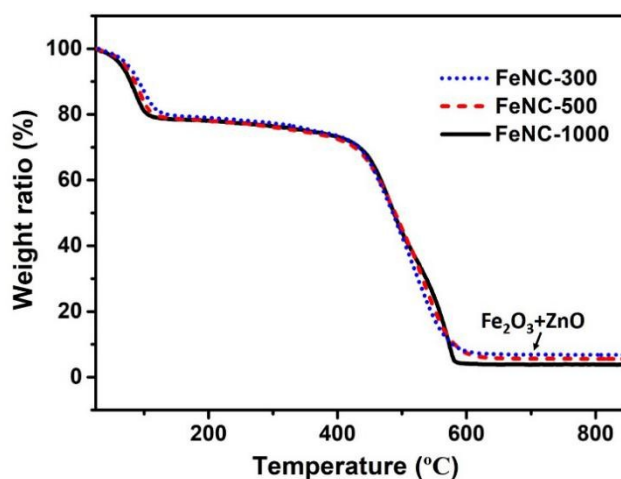

**Figure S8.** TG curves of FeNC-300/500/1000 catalysts measured in air.

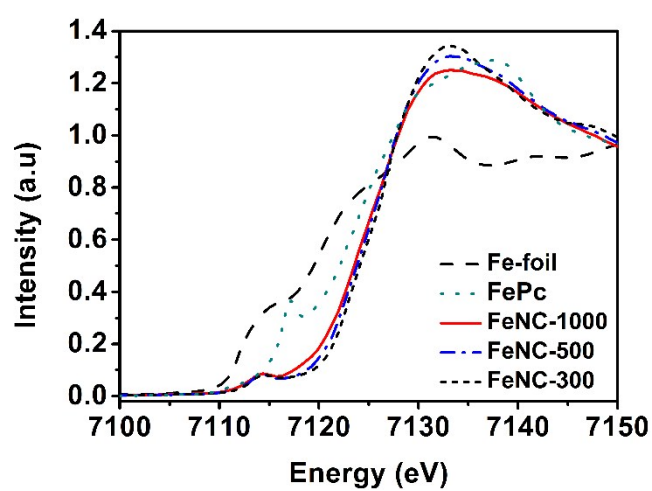

**Figure S9.** Normalized XANES spectra at Fe-K edge of FeNC-300/500/1000 and references.

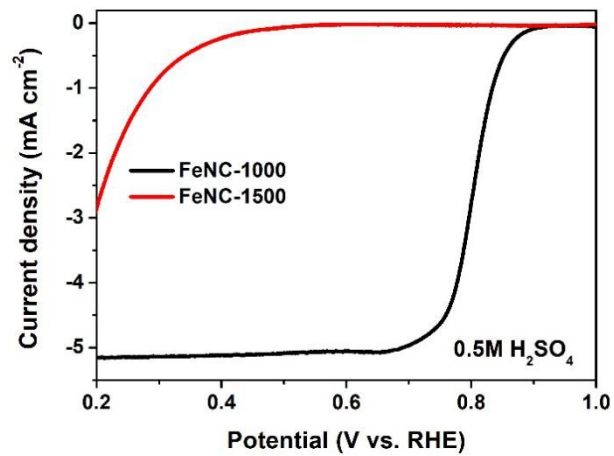

**Figure S10.** LSV curves of FeNC-1000 and FeNC-1500 in O<sub>2</sub> saturated 0.5 M H<sub>2</sub>SO<sub>4</sub> by the RRDE test.

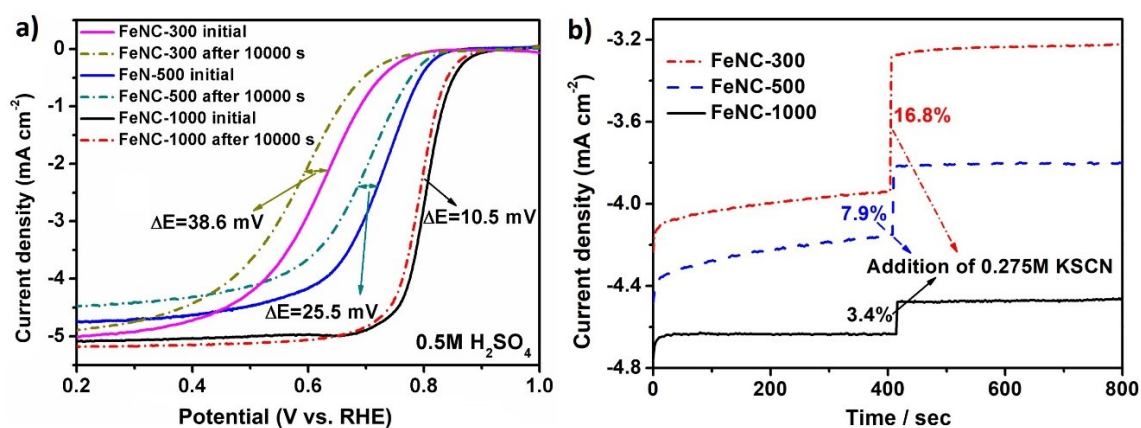

**Figure S11.** LSV curves of FeNC-300/500/1000 a) before and after durability tests, b) chronoamperometric curves of KSCN poisoning experiments tested at 0.50 V vs RHE. 0.375 M methanol was added at  $t = 400$  s into the oxygen saturated 0.5 M H<sub>2</sub>SO<sub>4</sub>.

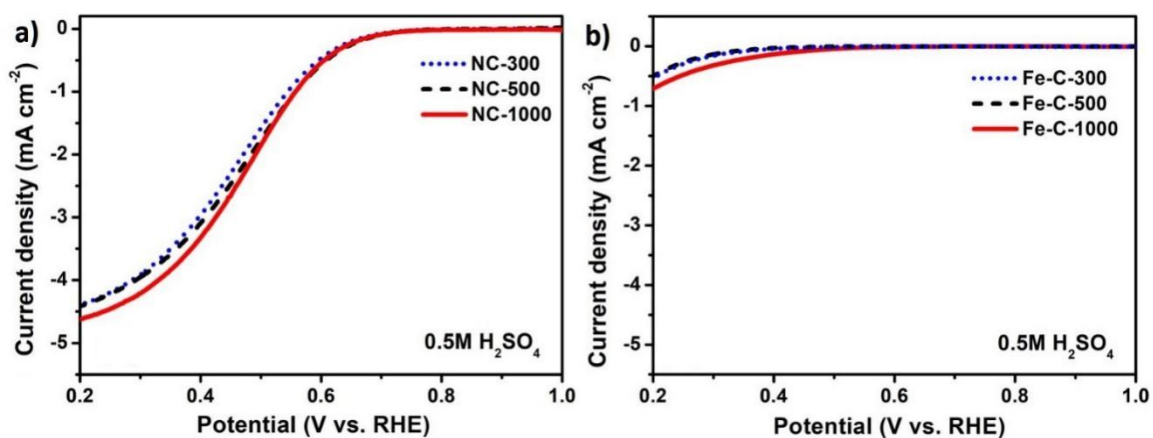

**Figure S12.** LSV curves of a) N/C-300/500/1000, b) Fe-C-/300/500/1000 in O<sub>2</sub> saturated 0.5 M H<sub>2</sub>SO<sub>4</sub> by RRDE tests.



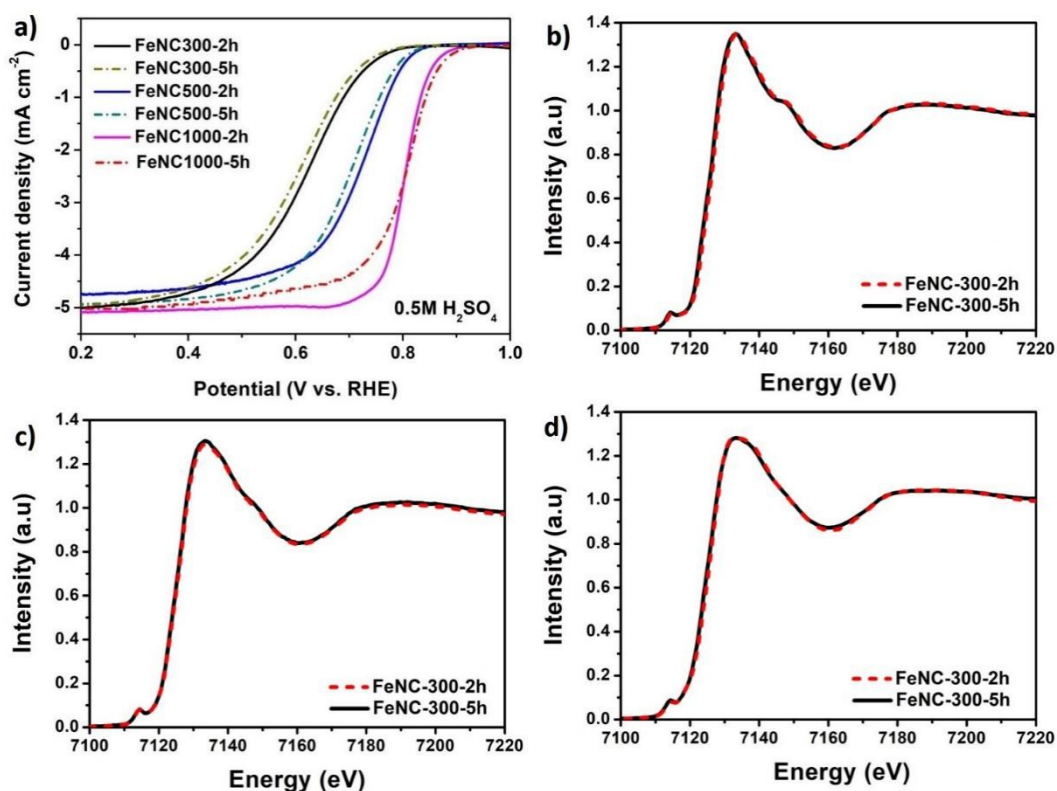

**Figure S13.** Comparison of FeNC-300/500/1000 prepared by 2 and 5 h pyrolysis. a) LSV curves measured in oxygen saturated 0.5 M H<sub>2</sub>SO<sub>4</sub>, b~d) XANES spectra at Fe-K edge.

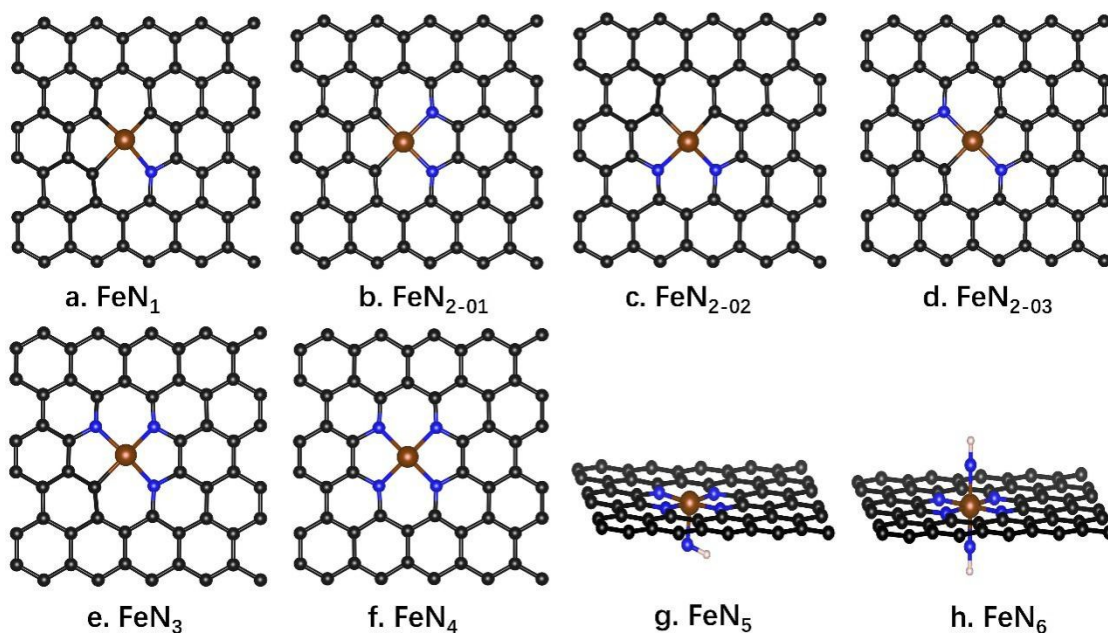

**Figure S14.** Atomic structures of FeN<sub>1</sub>~FeN<sub>6</sub>. Black, brown, white and blue balls represent C, Fe, H and N atoms respectively.

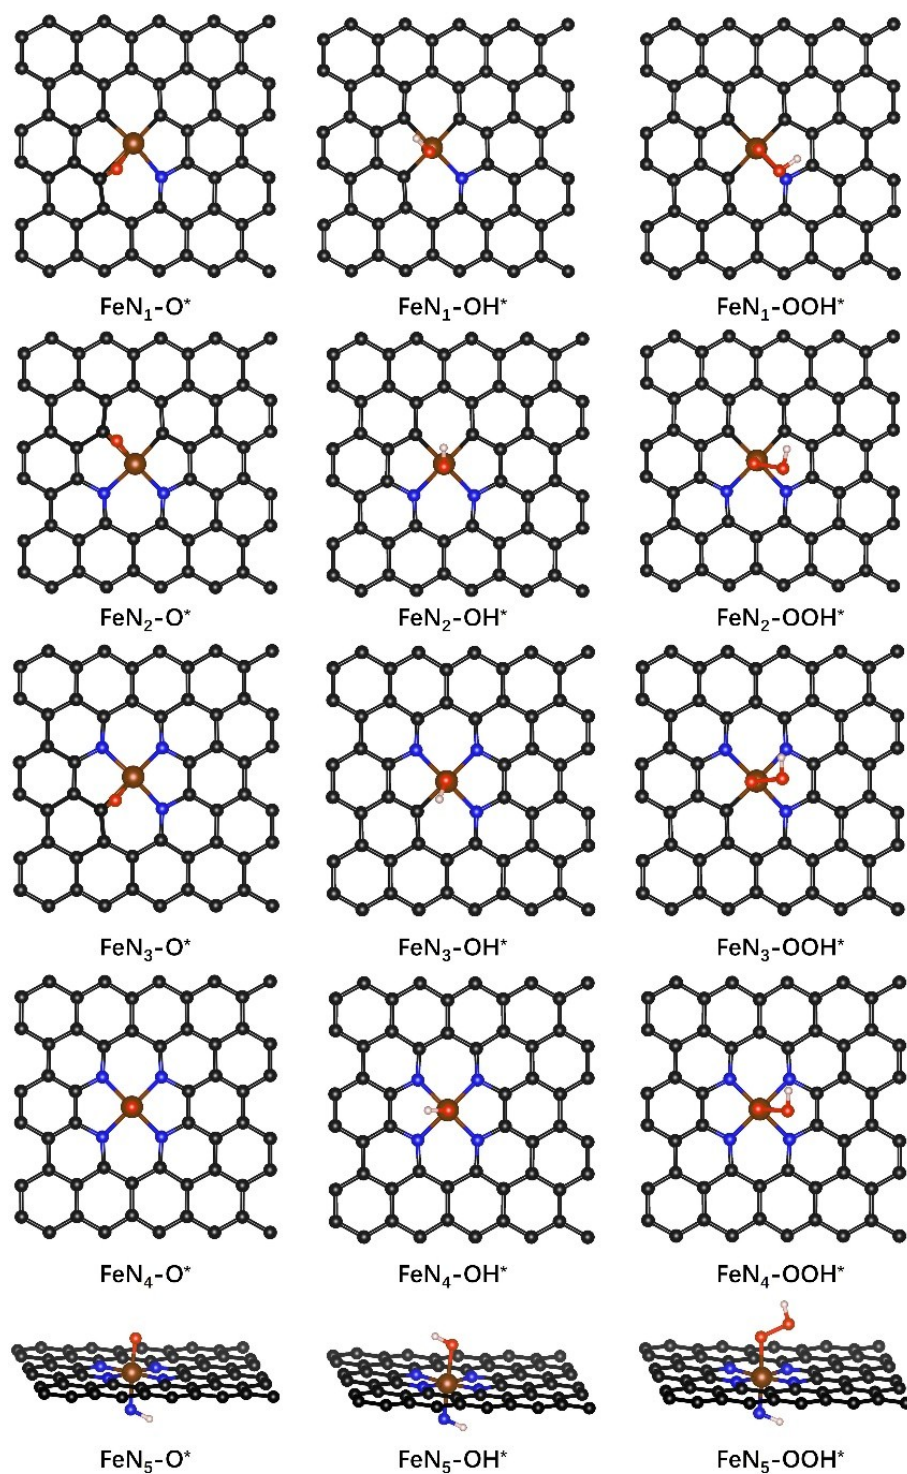

**Figure S15.** The most stable adsorption configurations of O, OH and OOH on FeN<sub>x</sub> (x=1~5). Brown, blue, black, red and pink balls represent Fe, N, C, O and H atoms, respectively.

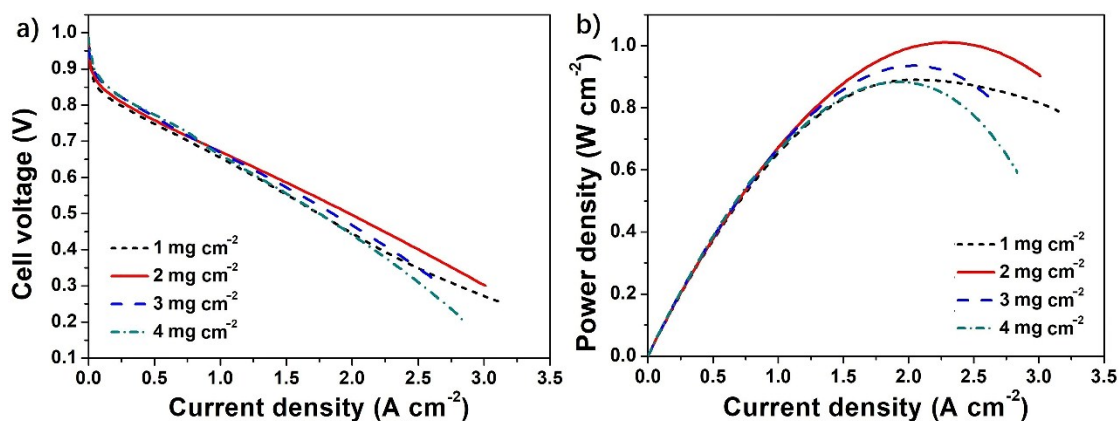

**Figure S16.** PEMFC a) polarization curves and b) power density curves of FeNC-1000 with the indicated loadings on cathode. (The fuel cell operation condition: 80 °C, 100% humidified H<sub>2</sub> and O<sub>2</sub> with flow rates of 200 and 240 mL min<sup>-1</sup>, respectively. The gauge pressures of H<sub>2</sub> and O<sub>2</sub> are 22 psig.)

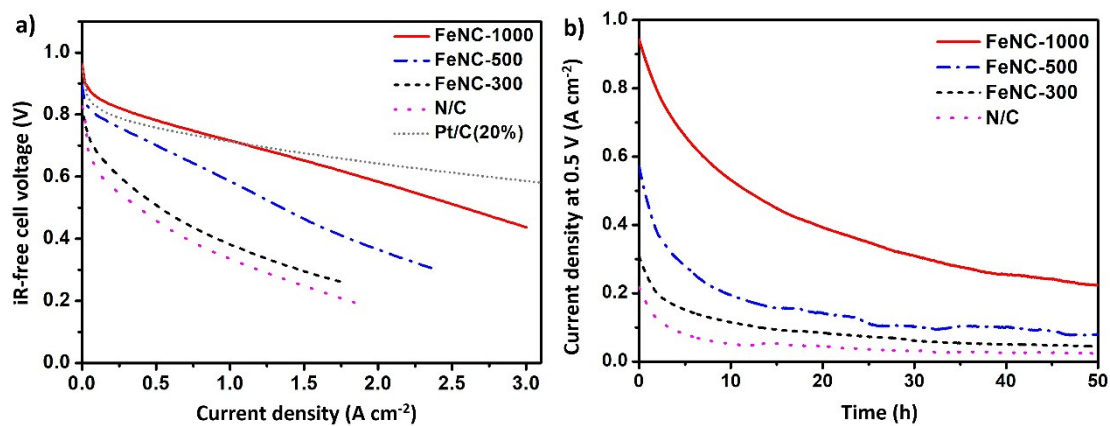

**Figure S17.** a) Internal resistance compensated polarization curves of FeNC-300/500/1000 and Pt/C(20 wt%). b) Durability tests in the fuel cell of FeNC-300/500/1000 in the initial 50 h measured at a constant voltage of 0.5 V at 80 °C. H<sub>2</sub> and O<sub>2</sub> flow rates are 200 and 240 mL min<sup>-1</sup>, respectively.



**Table S1.** BET surface areas of the indicated materials.

| Sample                                             | ZIF-8 | N/C | Fe@N/C | FeNC-300 | FeNC-500 | FeNC-1000 |
|----------------------------------------------------|-------|-----|--------|----------|----------|-----------|
| BET surface area (m <sup>2</sup> g <sup>-1</sup> ) | 1358  | 885 | 799    | 948      | 1054     | 1188      |

**Table S2.** Fe and Zn contents in the catalysts obtained by ICP measurements.

| Sample    | Fe (wt.%) | Zn (wt.%) |
|-----------|-----------|-----------|
| FeNC-300  | 0.25      | 0.86      |
| FeNC-500  | 0.20      | 0.77      |
| FeNC-1000 | 0.22      | 0.45      |

**Table S3.** C, O, Fe and N contents and the proportion of different types of nitrogen in FeNC-300/500/1000 obtained by XPS measurements.

| Sample        | FeNC-300 | FeNC-500 | FeNC-1000 |
|---------------|----------|----------|-----------|
| C 1s (wt%)    | 81.89    | 81.68    | 82.84     |
| O 1s (wt%)    | 6.84     | 6.92     | 7.22      |
| Fe 2p (wt%)   | 3.77     | 3.83     | 3.91      |
| N 1s (wt%)    | 7.89     | 7.76     | 5.93      |
| N-oxidized/%  | 2.57     | 2.2      | 1.12      |
| Graphitic N/% | 7.98     | 9.01     | 11.43     |
| Pyrrolic N/%  | 24.64    | 22.28    | 23.78     |
| Fe-N/%        | 22.26    | 29.95    | 33.66     |
| Pyridinic N/% | 36.38    | 30.43    | 24.7      |

**Table S4.** Fitting results of Fe K-edge FT-EXAFS curves.

| Sample   | Path | $N$ | $R(\text{\AA})$ | $\sigma^2(\text{\AA}^2)$ | $\Delta E_0$ (eV) | $S_0^2$ | $R$ factor |
|----------|------|-----|-----------------|--------------------------|-------------------|---------|------------|
| FeNC-300 | Fe-C | 3.1 | 1.96            | 0.0026                   | -7.02             | 0.92    | 0.0032     |
|          | Fe-N | 1.0 | 2.00            | 0.0008                   |                   |         |            |
|          | Fe-C | 4.0 | 2.56            | 0.0042                   |                   |         |            |
|          | Fe-C | 4.1 | 2.69            | 0.0009                   |                   |         |            |
|          | Fe-C | 2.4 | 3.45            | 0.0002                   |                   |         |            |
| FeN-500  | Fe-C | 1.0 | 1.80            | 0.0006                   | 2.74              | 0.92    | 0.0003     |
|          | Fe-N | 2.8 | 2.03            | 0.0017                   |                   |         |            |
|          | Fe-C | 4.0 | 2.86            | 0.0181                   |                   |         |            |
|          | Fe-C | 3.8 | 3.04            | 0.0010                   |                   |         |            |
|          | Fe-C | 2.0 | 3.38            | 0.0042                   |                   |         |            |
| FeN-1000 | Fe-N | 4.0 | 1.92            | 0.0074                   | -3.67             | 0.92    | 0.0021     |
|          | Fe-C | 3.9 | 2.61            | 0.0069                   |                   |         |            |
|          | Fe-C | 4.2 | 2.87            | 0.0066                   |                   |         |            |
|          | Fe-C | 2.3 | 3.43            | 0.0010                   |                   |         |            |

$N$  is coordination number,  $R$  is the distance between absorber and backscatter atoms,  $\sigma_2$  is Debye-Waller factor to account for both thermal and structural disorders,  $\Delta E_0$  is inner potential correction;  $R$  factor indicates the goodness of the fit. Error bounds (accuracies) that characterize the structural parameters obtained by EXAFS spectroscopy were estimated as  $N \pm 20\%$ ;  $R \pm 1\%$ ;  $\sigma_2 \pm 20\%$ ;  $\Delta E_0 \pm 20\%$ .  $S_0^2$  was fixed to 0.92 as determined from Fe foil fitting.

**Table S5.** ORR activities of Fe-N-C single atom catalysts with FeN<sub>4</sub> active sites.

| Sample                      | Electrolyte                                     | $E_{onset}$ (V) | $E_{1/2}$ (V vs RHE) | Ref.      |
|-----------------------------|-------------------------------------------------|-----------------|----------------------|-----------|
| FeNC-1000                   | 0.5 M H <sub>2</sub> SO <sub>4</sub> /0.1 M KOH | 0.89/0.99       | 0.80/0.90            | This Work |
| SA-Fe-N nanosheets          | 0.5 M H <sub>2</sub> SO <sub>4</sub>            | 0.94            | 0.81                 | [14]      |
| (CM+PANI)-Fe-C              | 0.5 M H <sub>2</sub> SO <sub>4</sub>            | 0.92*           | 0.80 V               | [15]      |
| FeN <sub>4</sub> /GN-2.7    | 1M NaOH                                         | 0.98*           | 0.91*                | [16]      |
| Fe-ISAs/CN                  | 0.1 M KOH                                       | 0.99            | 0.9                  | [17]      |
| FePhenMOF-ArNH <sub>3</sub> | 0.1 M HClO <sub>4</sub>                         | 0.98            | 0.78                 | [18]      |
| Fe <sub>2</sub> -Z8-C       | 0.5 M H <sub>2</sub> SO <sub>4</sub> /0.1 M KOH | 0.90/0.99       | 0.81/0.87            | [19]      |
| Fe-N-C-950                  | 0.1 M HClO <sub>4</sub>                         | 0.92            | 0.78                 | [20]      |
| Fe-ZIF                      | 0.5 M H <sub>2</sub> SO <sub>4</sub>            | 0.92*           | 0.85/0.88            | [21]      |
| SA-Fe/NG                    | 0.5 M H <sub>2</sub> SO <sub>4</sub>            | 0.9             | 0.8                  | [22]      |
| FeSAs/PTF-600               | 0.1 M HClO <sub>4</sub> /0.1 M KOH              | 0.89/1.01       | 0.77*/0.87           | [23]      |

\*These values are not directly given in the papers. They were obtained by digging the polarization curves.

**Table S6.** Formation energies (eV) and ORR overpotentials (V vs RHE) of FeN<sub>x</sub> (x=1~6) active sites calculated by DFT.

| Active site  | FeN <sub>1</sub> | FeN <sub>2-01</sub> | FeN <sub>2-02</sub> | FeN <sub>2-03</sub> | FeN <sub>3</sub> | FeN <sub>4</sub> | FeN <sub>5</sub> | FeN <sub>6</sub> |
|--------------|------------------|---------------------|---------------------|---------------------|------------------|------------------|------------------|------------------|
| $E_f$        | -1.24            | -2.51               | -2.75               | -2.37               | -3.82            | -5.10            | -4.09            | -0.95            |
| $\eta^{ORR}$ | 1.04             | /                   | 0.79                | /                   | 0.75             | 0.51             | 1.17             | /                |

**Table S7.** Adsorption free energies of O, OH and OOH (eV) on FeN<sub>x</sub> (x=1~5) sites.

| Active site      | $\Delta G_O^*$ | $\Delta G_{OH}^*$ | $\Delta G_{OOH}^*$ |
|------------------|----------------|-------------------|--------------------|
| FeN <sub>1</sub> | 0.65           | 0.46              | 3.70               |
| FeN <sub>2</sub> | 1.20           | 0.44              | 3.93               |
| FeN <sub>3</sub> | 1.21           | 0.48              | 3.94               |
| FeN <sub>4</sub> | 1.48           | 0.77              | 3.89               |
| FeN <sub>5</sub> | 3.01           | 1.70              | 4.85               |

**Table S8.** Adsorption energies of gaseous H<sub>2</sub>O (eV) on FeN<sub>x</sub> (x=1~5) sites.

| Active Site      | FeN <sub>1</sub> | FeN <sub>2-6</sub> | FeN <sub>3</sub> | FeN <sub>4</sub> | FeN <sub>5</sub> |
|------------------|------------------|--------------------|------------------|------------------|------------------|
| E <sub>ads</sub> | -0.33            | -0.34              | -0.28            | -0.23            | -0.04            |
| Bond Length / Å  | 2.223            | 2.290              | 2.304            | 2.379            | 3.196            |

**Table S9.** Reaction free energies (eV) of elementary step for ORR at  $U_{RHE} = 0$  V on FeN<sub>x</sub> (x=1~5) active sites.

| Active site      | $\Delta G_1$ | $\Delta G_2$ | $\Delta G_3$ | $\Delta G_4$ |
|------------------|--------------|--------------|--------------|--------------|
| FeN <sub>1</sub> | -1.22        | -3.05        | -0.19        | -0.46        |
| FeN <sub>2</sub> | -0.99        | -2.73        | -0.75        | -0.44        |
| FeN <sub>3</sub> | -0.97        | -2.75        | -0.72        | -0.48        |
| FeN <sub>4</sub> | -1.03        | -2.40        | -0.72        | -0.77        |
| FeN <sub>5</sub> | -0.06        | -1.85        | -1.31        | -1.70        |

**Table S10.**  $T \times S$  values (the entropy multiplied by  $T$ ,  $T = 298.15$  K,) and zero-point energy (ZEP) that are used to correct the free energy of reactants, products, and intermediate species adsorbed on FeN<sub>x</sub> (x=1~5) active sites.

| Species          | $T \times S$ (eV) | $ZPE$ (eV) |
|------------------|-------------------|------------|
| O*               | 0                 | 0.10/0.07  |
| OH*              | 0                 | 0.34       |
| OOH*             | 0                 | 0.43       |
| O <sub>2</sub>   | 0.64              | 0.10       |
| H <sub>2</sub>   | 0.41              | 0.27       |
| H <sub>2</sub> O | 0.67              | 0.56       |

\* The  $ZPE$  values of O\* on the bridge site and top side are 0.10 and 0.07 eV respectively. The  $ZPE$  values of OH\* and OOH\* are averaged over all single atom catalyst systems because they have very close value.

#### 4. References:

- 1 D. Zhang, W. Chen, Z. Li, Y. Chen, L. Zheng, Y. Gong, Q. Li, R. Shen, Y. Han, W. C. Cheong, L. Gu and Y. Li, *Chem. Commun.*, 2018, **54**, 4274-4277.
- 2 M. Newville, *J. Synchrotron Radiat.*, 2001, **8**, 322-324.
- 3 H. Xu, D. Cheng, D. Cao and X. C. Zeng, *Nat. Catal.*, 2018, **1**, 339-348.
- 4 X. Zhang, Z. Yang, Z. Lu and W. Wang, *Carbon*, 2018, **130**, 112-119.
- 5 C. Zhao, X. Dai, T. Yao, W. Chen, X. Wang, J. Wang, J. Yang, S. Wei, Y. Wu and Y. Li, *J. Am. Chem. Soc.*, 2017, **139**, 8078-8081.
- 6 G. Kresse and J. Furthmüller, *Comput. Mater. Sci.*, 1996, **6**, 15-50.
- 7 G. Kresse and J. Furthmüller, *Phys. Rev. B*, 1996, **54**, 11169-11186
- 8 G. Kresse and D. Joubert, *Phys. Rev. B*, 1999, **59**, 1758-1775.
- 9 J. P. Perdew, K. Burke and M. Ernzerhof, *Phys. Rev. Lett.*, 1996, **77**, 3865-3868.
- 10 I. C. Man, H.-Y. Su, F. Calle-Vallejo, H. A. Hansen, J. I. Martínez, N. G. Inoglu, J. Kitchin, T. F. Jaramillo, J. K. Nørskov and J. Rossmeisl, *ChemCatChem*, 2011, **3**, 1159-1165.
- 11 J. K. Nørskov, J. Rossmeisl, A. Logadottir and L. L., *J. Phys. Chem. B*, 2004, **108**, 17886–17892.

- 12 J. K. Nørskov, J. Rossmeisl, A. Logadottir and L. L., *J. Phys. Chem. B*, 2004, **108**, 17886-17892.
- 13 F. Calle-Vallejo, J. I. Martinez and J. Rossmeisl, *Phys. Chem. Chem. Phys.*, 2011, **13**, 15639-15643.
- 14 Z. Miao, X. Wang, M.-C. Tsai, Q. Jin, J. Liang, F. Ma, T. Wang, S. Zheng, B.-J. Hwang, Y. Huang, S. Guo and Q. Li, *Adv. Energy. Mater.*, 2018, **8**, 1801226.
- 15 H. T. Chung, D. A. Cullen, D. Higgins, B. T. Sneed, E. F. Holby, K. L. More and P. Zelenay, *Science*, 2017, **357**, 479–484.
- 16 X. Chen, L. Yu, S. Wang, D. Deng and X. Bao, *Nano Energy*, 2017, **32**, 353-358.
- 17 Y. Chen, S. Ji, Y. Wang, J. Dong, W. Chen, Z. Li, R. Shen, L. Zheng, Z. Zhuang, D. Wang and Y. Li, *Angew. Chem. Int. Ed.*, 2017, **56**, 6937-6941.
- 18 J. Li, S. Ghoshal, W. Liang, M.-T. Sougrati, F. Jaouen, B. Halevi, S. McKinney, G. McCool, C. Ma, X. Yuan, Z.-F. Ma, S. Mukerjee and Q. Jia, *Energy Environ. Sci.*, 2016, **9**, 2418-2432.
- 19 Q. Liu, X. Liu, L. Zheng and J. Shui, *Angew. Chem. Int. Edit.*, 2018, **57**, 1204-1208.
- 20 M. Xiao, J. Zhu, L. Ma, Z. Jin, J. Ge, X. Deng, Y. Hou, Q. He, J. Li, Q. Jia, S. Mukerjee, R. Yang, Z. Jiang, D. Su, C. Liu and W. Xing, *ACS Catal.*, 2018, **8**, 2824-2832.
- 21 H. Zhang, S. Hwang, M. Wang, Z. Feng, S. Karakalos, L. Luo, Z. Qiao, X. Xie, C. Wang, D. Su, Y. Shao and G. Wu, *J. Am. Chem. Soc.*, 2017, **139**, 14143-14149.
- 22 L. Yang, D. Cheng, H. Xu, X. Zeng, X. Wan, J. Shui, Z. Xiang and D. Cao, *Proc. Natl. Acad. Sci.*, 2018, **115**, 6626-6631.
- 23 J. Yi, R. Xu, Q. Wu, T. Zhang, K.-T. Zang, J. Luo, Y.-L. Liang, Y.-B. Huang and R. Cao, *ACS Energy Lett.*, 2018, **3**, 883-889.
